# Supplementary figures and images for: Aspiration and sampling efficiencies of the TSP and louvered particulate matter inlets
Source: Royal Society of Chemistry journal article supplement (doi:10.1039/b419001g), 2005-01-01

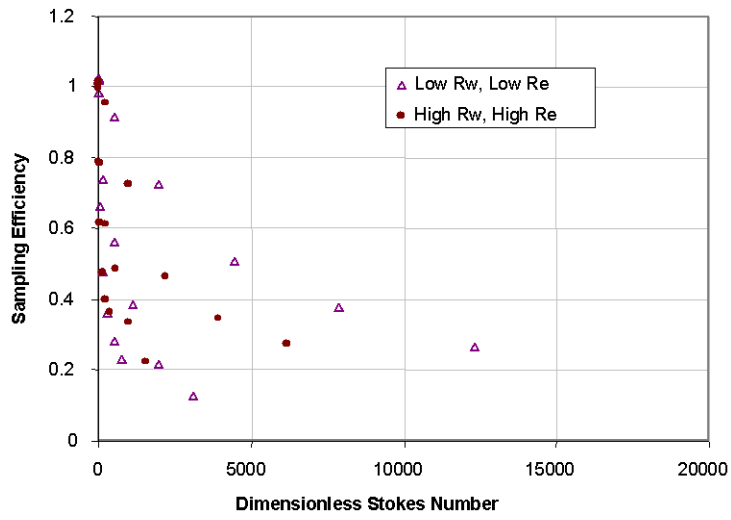

Fig. 8

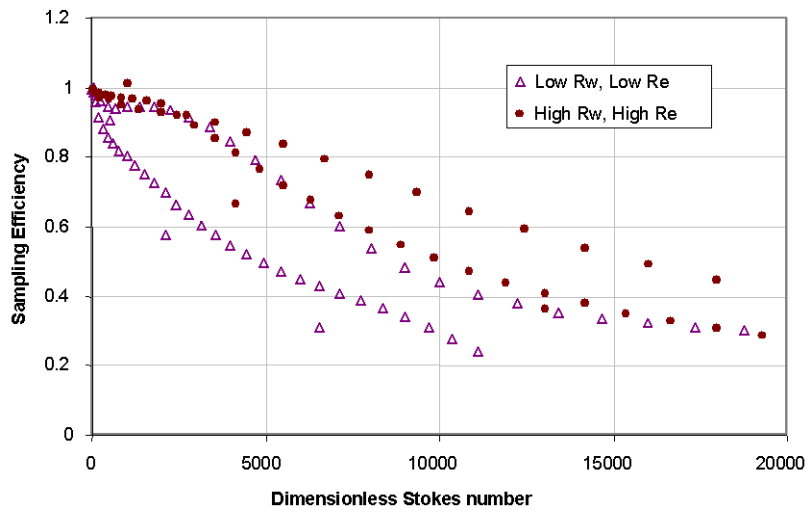

Fig. 9

Supplement: b419001g.pdf [file b419001g.pdf]
